# Supplementary material
Source: PubMed Central journal article supplement (PMC454150)

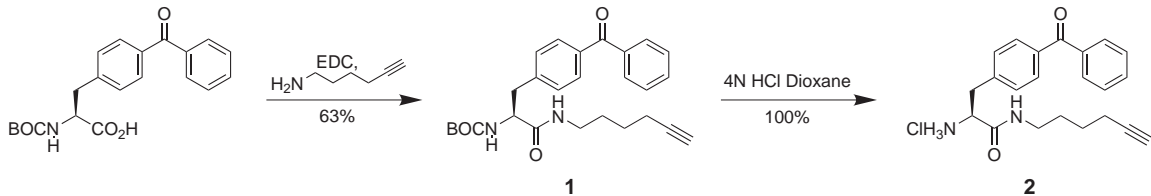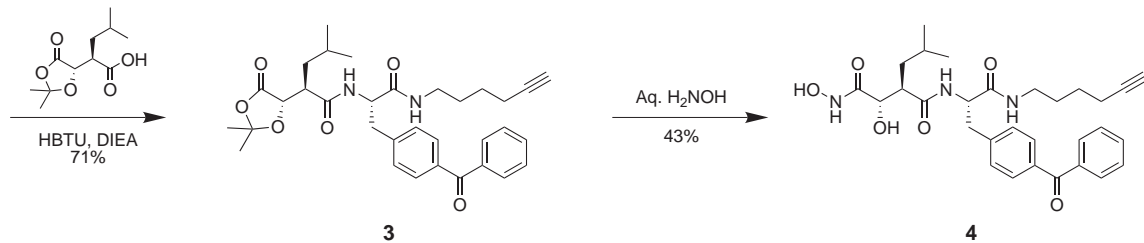

Supplement: pnas_101_27_10000__2.pdf [file pnas_101_27_10000__2.pdf]

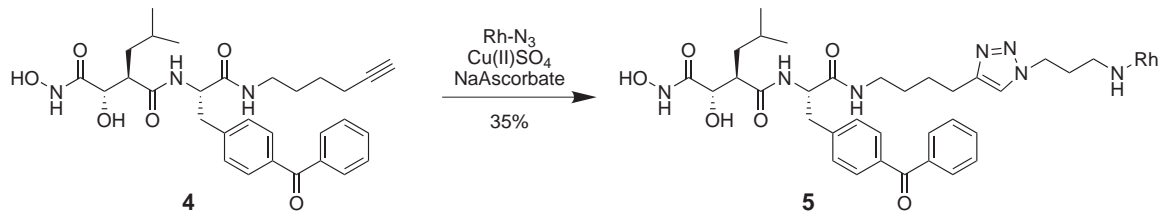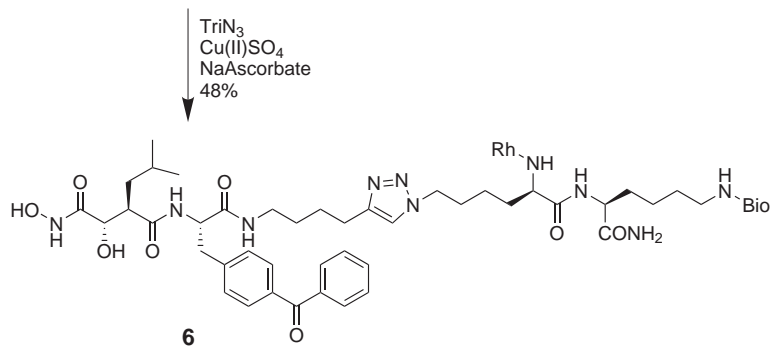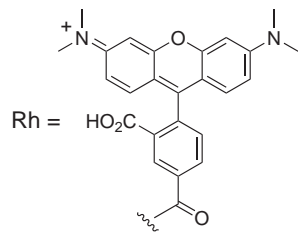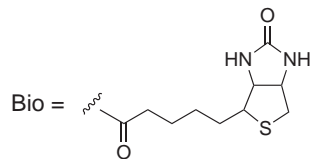

Supplement: pnas_101_27_10000__3.pdf [file pnas_101_27_10000__3.pdf]

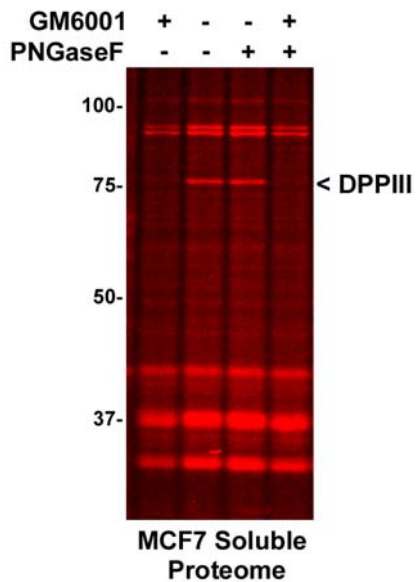

Supplement: pnas_101_27_10000__4.pdf [file pnas_101_27_10000__4.pdf]
